# Empirical field mapping for gradient nonlinearity correction of multi-site diffusion weighted MRI

Colin B. Hansen\*<sup>1</sup>, Baxter P. Rogers\*<sup>2,3</sup>, Kurt G. Schilling<sup>2</sup>, Vishwesh Nath<sup>1</sup>,  
Justin A. Blaber<sup>4</sup>, Okan Irfanoglu<sup>5</sup>, Alan Barnett<sup>5</sup>, Carlo Pierpaoli<sup>5</sup>,  
Adam W. Anderson<sup>2,3</sup>, Bennett A. Landman<sup>1,2,3,4</sup>

<sup>1</sup>Computer Science, Vanderbilt University, Nashville, TN, USA;

<sup>2</sup>Department of Radiology and Radiological Sciences, Vanderbilt University Medical Center,  
Nashville, TN USA;

<sup>3</sup>Department of Biomedical Engineering, Vanderbilt University, Nashville, TN USA;

<sup>4</sup>Electrical Engineering, Vanderbilt University, Nashville, TN, USA;

<sup>5</sup>National Institute of Biomedical Imaging and Bioengineering, Bethesda MD USA;

*Corresponding Author:*

*Colin Hansen*

*PhD Student*

*Computer Science, Vanderbilt University*

*Email: [colin.b.hansen@vanderbilt.edu](mailto:colin.b.hansen@vanderbilt.edu)*

## ACKNOWLEDGEMENTS

This work was supported by the National Institutes of Health under award numbers R01EB017230 and T32EB001628, and in part by the National Center for Research Resources, Grant UL1 RR024975-01. The content is solely the responsibility of the authors and does not necessarily represent the official views of the NIH.

1  
2  
3  
4  
5  
6  
7  
8  
9  
10  
11  
12  
13  
14  
15  
16  
17

## ABSTRACT

**Background:** Achieving inter-site / inter-scanner reproducibility of diffusion weighted magnetic resonance imaging (DW-MRI) metrics has been challenging given differences in acquisition protocols, analysis models, and hardware factors.

**Purpose:** Magnetic field gradients impart scanner-dependent spatial variations in the applied diffusion weighting that can be corrected if the gradient nonlinearities are known. However, retrieving manufacturer nonlinearity specifications is not well supported and may introduce errors in interpretation of units or coordinate systems. We propose an empirical approach to mapping the gradient nonlinearities with sequences that are supported across the major scanner vendors.

**Study Type:** Prospective observational study

**Subjects:** A spherical isotropic diffusion phantom, and a single human control volunteer

**Field Strength/Sequence:** 3T (two scanners). Stejskal-Tanner spin echo sequence with b-values of 1000, 2000 s/mm<sup>2</sup> with 12, 32, and 384 diffusion gradient directions per shell.

**Assessment:** We compare the proposed correction with the prior approach using manufacturer specifications against typical diffusion pre-processing pipelines (i.e., ignoring spatial gradient nonlinearities). In phantom data, we evaluate metrics against the ground truth. In human and phantom data, we evaluate reproducibility across scans, sessions, and hardware.

18 **Statistical Tests:** Wilcoxon rank-sum test between uncorrected and corrected data.

19 **Results:** In phantom data, our correction method reduces variation in mean diffusivity across  
20 sessions over uncorrected data ( $p < 0.05$ ). In human data, we show that this method can also reduce  
21 variation in mean diffusivity across scanners ( $p < 0.05$ ).

22 **Conclusion:** Our method is relatively simple, fast, and can be applied retroactively. We advocate  
23 incorporating voxel-specific b-value and b-vector maps should be incorporated in DW-MRI  
24 harmonization preprocessing pipelines to improve quantitative accuracy of measured diffusion  
25 parameters.

26 **Keywords:** Gradient Nonlinearity, Field Estimation, Pre-processing, DW-MRI

27

28

## INTRODUCTION

29 Physics underlying magnetic resonance imaging (MRI) gradient coil designs result in nonuniform  
30 magnetic field gradients during acquisition. This leads to spatial image warping [1-4] in magnetic  
31 resonance images and gradient distortion in diffusion weighted magnetic resonance imaging (DW-  
32 MRI) [5-9]. The introduced spatial variation can impact estimated diffusion tensor information  
33 [10] or high-angular resolution diffusion measurements [11]. Bammer et al. show in extreme cases  
34 the gradient nonuniformity can lead to an overestimation in the diffusion coefficient up to 30%  
35 and an underestimation up to 15% [12]. The severity of the effect increases with distance from the  
36 magnet's isocenter [12] and with higher gradient amplitudes [12, 13]. The artifact becomes  
37 especially troubling for multi-site studies that have varying scanner models and manufacturers [14]  
38 and for studies utilizing very large gradient amplitudes such as in the human connectome project  
39 (HCP) which utilized amplitudes up to 300 mT/m [13, 15, 16]. Recent work has shown the effect  
40 of gradient nonlinearities in the HCP cohort results in considerable bias in tractography results and  
41 potentially incorrect interpretations in group-wise studies [17].

42 Various estimates of the coil magnetic field nonlinearities have been applied to improve accuracy  
43 within and across sites [18-21]. An adaptive correction of diffusion information proposed by  
44 Bammer et al. relies on calculating the spatially varying gradient coil  $L$ . This approach is achieved  
45 by relating the actual gradients with the desired gradients [12], and has become standard practice  
46 [22, 23]. However, this approach assumes that the gradient calibration specified by the  
47 manufacturer is readily available. Spherical harmonics (SH) based techniques are already  
48 implemented by manufacturers in the scanning systems to account for the spatial image warping  
49 effects of gradient nonlinearities [1, 24-27]. Yet, the spherical harmonic coefficients are not

50 usually provided to regular users and may be subject to non-disclosure criteria. Additionally  
51 gradient nonlinearity correction has been approached using noncartesian MR image reconstruction  
52 [28].

53 To remove the need for the manufacturer supplied specifications, we demonstrate an empirical  
54 field-mapping procedure which can be universally applied across platforms as defined by Rogers  
55 et al. [29, 30]. At two scanners (scanner A and scanner B), a large oil-filled phantom is used to  
56 measure the magnetic field produced by each gradient coil. To estimate the achieved diffusion  
57 gradient directions and b-values on a voxel-wise basis, solid harmonic basis functions are fit to the  
58 measured magnetic field. The measured diffusivity (MD) and fractional anisotropy (FA) are  
59 compared without nonlinearity correction, with nonlinearity correction using estimated fields, and  
60 with nonlinearity correction using fields specified by the manufacturer for an ice-water diffusion  
61 phantom. The reproducibility is compared between without nonlinearity correction and with  
62 nonlinearity correction with the estimated fields for a subject scanned at two positions within the  
63 scanner at scanner A. We show that our method removes the need for manufacturer specified  
64 spherical harmonic coefficients and that the method reduces MD reproducibility error in-vivo  
65 when the effect of gradient nonlinearities is present.

## 66 **METHODS**

### 67 **Measurement of gradient coil-generated magnetic fields**

68 Data were acquired across two 3T scanners: Scanner A and scanner B. Both of these are 94 cm  
69 bore Philips Intera Achieva MR whole-body systems and have a gradient strength of 80 mT/m, a  
70 200 T/m/s slew-rate. A phantom is used to estimate the gradient coil fields. The phantom is 24

71 liters of a synthetic white oil (SpectraSyn 4 polyalphaolefin, ExxonMobil) in a polypropylene  
72 carboy with an approximate diameter of 290mm and height of 500mm [30]. This oil is used by the  
73 manufacturer for some of their calibration phantoms which made it a reasonable choice. The  
74 phantom was placed approximately at scanner isocenter and imaged with a dual echo GRE-based  
75 field mapping sequence. Images are acquired at two echo times 1ms apart, and the fieldmap is  
76 computed from the phase difference of the two images. This follows the manufacturer's field  
77 mapping and provides a field map with minimal phase wrapping or distortion. Four field maps  
78 were acquired, one with shim field set to 0.05 mT/m on each axis X, Y, Z plus a final image with  
79 gradient coil shim fields set to zero. Each used a 384 mm field of view with 4 mm isotropic voxel  
80 size. Total scan time was approximately 5 minutes. Gradient coil fields were estimated by  
81 subtracting the zero-shim field map from each coil's respective 0.05 mT/m field map. It should be  
82 noted that the proposed method requires that the field maps are made using the same coils used to  
83 produce the diffusion gradients, and systems that utilize gradient coil inserts may not be able to  
84 directly utilize the technique. Field maps were acquired on 40 dates over the course of a year at  
85 scanner B while scanner A only one session was acquired with the fieldmapping phantom.

86 For each coil, we modeled the magnetic field spatial variation as a sum of solid harmonics [12, 31,  
87 32] to 7th order, excluding even order terms due to the coils' physical symmetry. These basis  
88 functions were fit to the field measurements with robust least squares, using all voxels within a  
89 270 mm diameter sphere at isocenter. For comparison, the general shape of the human head is an  
90 ellipsoid with an average height of 180 to 200mm [33]. The result was an analytically differentiable  
91 estimate of the true magnetic field produced by each gradient coil (Figure 1). This fitting procedure  
92 was performed on an average field map derived from a series of scans to ensure stability. On

93 Scanner B, the fitting procedure is also performed on the scanner manufacturer's estimate of the  
94 coil fields as measured during manufacturing and installation. These are provided as a set of solid  
95 harmonic functions and corresponding coefficients. The series of scans which are averaged are  
96 defined for each subject session according to the closest 10 field map sessions in terms of date for  
97 scanner B whereas 10 acquisitions were acquired within a single session at scanner A which are  
98 averaged.

### 99 **Estimating achieved b-values and gradient directions**

100 A spatially varying tensor  $L$  relates the achieved magnetic field gradient to the intended one [12]:

$$101 \quad L = \begin{bmatrix} \frac{\partial B_z^{(x)}}{\partial x} & \frac{\partial B_z^{(y)}}{\partial x} & \frac{\partial B_z^{(z)}}{\partial x} \\ \frac{\partial B_z^{(x)}}{\partial y} & \frac{\partial B_z^{(y)}}{\partial y} & \frac{\partial B_z^{(z)}}{\partial y} \\ \frac{\partial B_z^{(x)}}{\partial z} & \frac{\partial B_z^{(y)}}{\partial z} & \frac{\partial B_z^{(z)}}{\partial z} \end{bmatrix} \quad (1)$$

102 where  $B_z^{(x)}$  is the z component of the magnetic field produced by unit amplitude of a nominal x-  
103 gradient coil current, and similarly for (y) and (z). This tensor may be computed analytically from  
104 the solid harmonic approximation to the measured field, then evaluated at spatial locations of  
105 interest. We can use  $L$  to relate the assumed gradient vector to the achieved gradient field and as  
106 well as the assumed b-value to the achieved one. If we assume  $|g| = 1$  then the adjusted gradient  
107 vector and b-value become:

$$108 \quad g' = Lg \quad (2)$$

109 
$$g'' = \frac{g'}{|g'|} \quad (3)$$

110 
$$b' = b|g'|^2 \quad (4)$$

111 where  $b'$  is the adjusted b-value and  $g''$  is the adjusted and normalized gradient vector. In the  
112 common situation where the scanner reports the intended gradient direction and amplitude but the  
113 full b-matrix [34-36] is not known, an approximate correction to adjust the signal  $S_i$  for the  $i^{\text{th}}$   
114 diffusion acquisition relative to the reference signal  $S_0$  is [18]:

115 
$$\ln\left(\frac{S_i}{S_0}\right) = -bg_i'^T D g_i' = -bg_i'^T L^T D L g_i \quad (5)$$

116 where  $b$  is the scalar b-value,  $g$  is the intended gradient vector,  $g'$  is the actual gradient vector, and  
117  $D$  is the diffusion tensor. If we substitute with  $b'$  and  $g''$  equation 5 can be re-written as:

118 
$$\ln\left(\frac{S_i}{S_0}\right) = -b'g_i''^T D g_i'' = -b|g_i'|^2 \frac{g_i'^T}{|g_i'|} D \frac{g_i'}{|g_i'|} = -bg_i'^T L^T D L g_i \quad (6)$$

119 Importantly, this is spatially varying and processing occurs voxelwise, but this may be used in any  
120 desired way for further processing of the diffusion images. Figure 2 shows  $L$  for each voxel  
121 estimated using our empirical fieldmapping acquired on scanner B.

## 122 **EXPERIMENTS**

123 This section describes the set of analyses which aim to show the accuracy of the estimated fields  
124 as well as their impact on resulting DW-MRI metrics in phantom and human data. All DW-MRI  
125 are corrected for susceptibility distortion [37] and eddy current distortion [15] using FSL.



## 126 **Empirically Estimated Fieldmaps**

127 Gradient nonlinearity correction is only viable if we can depend on the estimation to match the  
128 true fields. To investigate if the magnitude estimated fieldmaps closely approximate the true fields,  
129 we compare them to the fieldmaps specified by the manufacturer on scanner B. This was not done  
130 for scanner A as the manufacturer specifications for scanner A were not provided. For comparison,  
131 we take the average fieldmap from the latest 10 oil phantom scans on scanner B and calculate the  
132 voxel-wise difference between this and the manufacturer specified fields. To evaluate the stability  
133 of the empirical estimations, we report the variance across fields estimated from 40 individual oil  
134 phantom scans acquired over time on scanner B. These additional acquisitions are unnecessary for  
135 practical use and are strictly for evaluation purposes. Only a single acquisition would be needed  
136 for this method to be deployed on a scanner to be applied to all previous and future acquisitions.  
137 All evaluations on the empirical fields use a spherical mask with a radius of 135mm from isocenter.

## 138 **Polyvinylpyrrolidone (PVP) phantom**

139 To evaluate the intra-scanner performance of the gradient field nonlinearity correction with the  
140 empirical fieldmaps in a controlled environment, we use a 43% Polyvinylpyrrolidone (PVP)  
141 aqueous solution in a sealed spherical container that is 160mm in diameter (PVP phantom) [38].  
142 The PVP phantom is a large homogeneous material, and estimated metrics are expected to be the  
143 same across the entire volume. Additionally, toxicology has shown PVP to be safe for use, and  
144 PVP is stable and uniform. At scanner B, the phantom was scanned at three positions along the  
145 magnet axis: superior (4cm above isocenter), isocenter, and inferior (8cm below isocenter). At  
146 each position DWI data was acquired with diffusion weighting applied in twelve directions at a b-  
147 value of 1000 s/mm<sup>2</sup> and twelve more were acquired at 2000 s/mm<sup>2</sup> with a TR of 7775, a voxel

148 resolution of 2.5mm by 2.5mm by 2.5mm, and a FOV of 240mm by 240mm by 170mm.  
149 Susceptibility distortion correction and eddy current distortion correction are applied without  
150 movement correction. Signal to noise ratio (SNR) was calculated by fitting the signal to a tensor  
151 in the phantom and taking the residuals after the fit. Using all diffusion volumes at each position,  
152 MD is calculated without and with gradient nonlinearity correction using the empirically derived  
153 fields and using the manufacturer specified fields. When calculating MD with the correction, the  
154 estimated achieved b-values and gradient directions for each voxel are used. We report error in  
155 terms of absolute percent error (APE) between each scan out of isocenter and the scan at isocenter.  
156 All non-diffusion volumes to a structural T1 image using a rigid body transform restricted to only  
157 use translations, and this registration is applied to the calculated MD before analysis.

## 158 **Human subject**

159 To evaluate the intra-scanner and inter-scanner performance of the gradient field nonlinearity  
160 correction with the empirical fieldmaps in-vivo, we scanned a single subject at scanner A and  
161 scanner B. At scanner B, two sessions were acquired of the subject with one session acquired with  
162 the bridge of the subject's nose positioned at isocenter within the magnet and one session acquired  
163 with the subject positioned 6cm superior from isocenter. At scanner A, only one session is acquired  
164 at isocenter. Each session consisted of twelve gradient directions at a b-value of 1000 s/mm<sup>2</sup>,  
165 twelve at a b-value of 2000 s/mm<sup>2</sup>, a TR of 3700ms, a voxel resolution of 2.5mm by 2.5mm by  
166 2.5mm, and a FOV of 240mm by 240mm by 170mm. Susceptibility distortion correction and eddy  
167 current distortion correction are applied with movement correction for each session. Using all  
168 diffusion volumes from each session, MD is calculated without and with gradient nonlinearity  
169 correction using the empirically derived fields. At scanner B, MD is also calculated after correction

170 with the manufacturer specifications. For analysis the scans are registered to a T1 acquired at  
171 isocenter using FSL Flirt [39]. We report MD error as the absolute percent error between the two  
172 scans acquired at scanner B and between the scan acquired at scanner A and the out of isocenter  
173 scan acquired at scanner B.

174 We also evaluate the performance of the empirical correction with higher quality acquisitions on  
175 scanner A. Again, two sessions are acquired of the subject: one with the bridge of the subject's  
176 nose positioned at isocenter and one where the subject is shifted 4cm inferior from isocenter. Each  
177 session consisted of 384 gradient directions at a b-value of  $1000 \text{ s/mm}^2$ , a voxel resolution of  
178  $2.5\text{mm} \times 2.5\text{mm} \times 2.5\text{mm}$ , and a FOV of  $240\text{mm} \times 240\text{mm} \times 170\text{mm}$ . Susceptibility distortion  
179 correction and eddy current distortion correction are applied with movement correction for each  
180 session. Using all diffusion volumes from each session, MD is calculated without and with gradient  
181 nonlinearity correction using the empirically derived fields. For analysis the scans are registered  
182 to a T1 acquired at isocenter using FSL Flirt [39]. We report MD error as the absolute percent error  
183 between the two scans.

## 184 RESULTS

### 185 Empirically Estimated Fieldmaps

186 There are small differences between the manufacturer and the measured field produced by the  
187 gradient coil. These are shown in Figure 1 in units of  $\mu\text{T}$  scaled by the intensity ( $\text{mT/m}$ ) of the  
188 applied gradient ( $\mu\text{T}/(\text{mT/m})$ , or  $\text{mm}$ ). On average the difference at a given voxel is approximately  
189  $1 \mu\text{T}/(\text{mT/m})$  in the x and y magnetic field gradients and  $2 \mu\text{T}/(\text{mT/m})$  in the z gradient field within  
190  $135\text{mm}$  of isocenter. The difference maps indicate the presence of some structural artifacts. The  
191 average standard deviation at a given voxel after 40 acquisitions acquired throughout a year is

192 approximately 4 uT/(mT/m) in the x and y fields and 6 uT/(mT/m) in the z field within 135mm of  
193 isocenter.

#### 194 **PVP phantom**

195 The mean absolute percent error within the phantom between the inferior scan and the isocenter  
196 scan is approximately 5% before correction. After correction using the manufacturer fields, this  
197 falls to approximately 1.6%. Correcting with the empirically derived fields leads to 0.9% mean  
198 error. Figure 3 shows most of the error before correction in the inferior regions of the phantom  
199 which were furthest from isocenter in the inferior scan.

200 When uncorrected, the mean absolute percent error within the phantom between the superior scan  
201 and the isocenter scan is approximately 4.9%. After correction using the manufacturer fields, this  
202 falls to approximately 2%. Correcting with the empirically derived fields leads to 1.3% mean error.  
203 Figure 4 shows most of the error before correction in the superior regions of the phantom which  
204 were furthest from isocenter in the superior scan.

#### 205 **Human repositioned**

206 The intra-scanner sessions on scanner B result in a mean absolute percent error of 5.9% before  
207 correction within the brain volume excluding CSF regions. After correcting the scans using the  
208 empirically estimated fields, the mean error is reduced to 5.6% and further to 5.4% if the  
209 manufacturer specifications are used during correction. Just as in with the phantom, the error  
210 attributable to the gradient nonlinearities before correction appears in the superior regions of the  
211 brain which were furthest from isocenter during one of the sessions (Figure 5).

212 For the inter-scanner experiment, the mean absolute percent error before correction is 7.2% and is  
213 reduced 6.9% after correction using the estimated fields. Clearly the error that is accounted for in  
214 the correction is the superior regions of the brain which were furthest from isocenter during the  
215 session acquired on scanner B (Figure 6).

216 The intra-scanner sessions acquired on scanner A using a significantly higher number of gradient  
217 directions results in a mean absolute percent error of 4.6% when no correction is applied. After  
218 correction using the empirically estimated fields, the mean error is reduced to 4.2%. The difference  
219 can be seen in the inferior regions of the brain, specifically the cerebellum which was furthest from  
220 isocenter during one of the sessions (Figure 7). Figure 8 shows the mean absolute percent error  
221 across all voxels within the phantom and within the brain volume excluding cerebrospinal fluid  
222 (CSF) regions for each method.

223

## DISCUSSION

224 In comparing the empirically estimated fields to the fields specified by the manufacturer, we find  
225 that our approximations are very similar. The largest differences are in the z gradient field which  
226 corresponds to the largest variations in all the estimated fields across 40 oil phantom acquisitions.  
227 In this study we use an average of fieldmaps across 10 acquisitions each acquired a week apart,  
228 but this should not be necessary as the field produced by the gradient coil depends only on the coil  
229 geometry and the current flowing in the coils. Unaltered system need only acquire the fields once  
230 for this method, but further study on the stability of the empirical mapping may be necessary.  
231 Additionally, further study on the stability of the fit of the spherical harmonics and the need for  
232 higher order basis may be necessary. Appendix A shows the effects of different orders.

233 The experiments with the PVP phantom show in a large isotropic volume the impact of the gradient  
234 nonlinearities within the magnet and the effectiveness of the correction. The small superior shift  
235 of 4cm results in over 15% error in the superior voxels. In the case of a large inferior shift and a  
236 smaller superior shift, the mean error is increased by a factor of two to five if these effects are not  
237 accounted for. If we consider the experiments involving the human subject, we can see the impact  
238 of this correction is reduced. This could in part due to imperfect registration which seems to have  
239 contributed to error in the anterior regions of the brain. Results may vary depending on registration  
240 strategy. We have tried multiple techniques with similar results. Though the absolute percent error  
241 only changed by 0.3% to 0.4%, some small regions see a similar magnitude of improvement, and  
242 it is qualitatively clear that the correction is impacting regions we expect. The differences between  
243 resulting absolute percent error using the empirical fields and the manufacturer fields is varies  
244 between the phantom and the human subject. The results for the phantom indicate that the  
245 estimated fields improve performance of the method, but the human subject results show a small  
246 advantage for using the manufacturer field directly.

247 Though all intra-scanner results on scanner B are compared against using the manufacturer field  
248 directly, future work should investigate the sensitivity of our proposed method and compare with  
249 other field mapping methods such as proposed by Janke et. al [24] even though these methods  
250 require that the manufacturer provide the solid harmonic coefficients. In recent work, another  
251 approach is proposed for correcting voxel-wise b-value errors. Instead of correcting for gradient  
252 nonlinearities in the coil, this method directly estimates a voxel-wise b-value map that is used to  
253 correct resulting diffusion metrics [40]. While this method could account for errors that stem from  
254 other sources of deviation than just gradient nonlinearities, the model requires an estimation of

255 more parameters and likely it would be best practice to acquire a calibration scan along with every  
256 subject acquisition. In comparison to apply the approach proposed in this work, only a single  
257 calibration scan is necessary for each system.

258 While this method is successful in circumventing the need for manufacturer specifications which  
259 are not always readily available, it should be noted that vendor-provided on-scanner gradient  
260 nonlinearity correction is preferred for translation in a clinical environment. Additionally, when  
261 working with any DICOM data coordinating world coordinate frame and patient frames can be  
262 incredibly nuanced and should be considered carefully when applying any corrections post  
263 acquisition. However, our approach remains as a solution to correct retroactively to enable the use  
264 of acquired datasets which should be corrected for gradient nonlinearity effects for use in clinic  
265 and in research.

## 266 **CONCLUSION**

267 This work shows that the errors caused by gradient nonlinearities is apparent in metrics derived  
268 from DW-MRI but can be reduced using the correction outlined by Bammer et al. Using  
269 empirically derived fields, we can achieve similar results without needing manufacturer  
270 specification of the hardware. In both phantom and in-vivo data, error in MD can be significantly  
271 reduced by applying this correction. We advocate for the use of gradient nonlinearity correction in  
272 standard diffusion preprocessing pipelines and provide a simple method for empirically measuring  
273 the fields necessary to account for the achieved b-values and b-vectors.

274

275

276 REFERENCES

- 277 1. Glover, G.H. and N.J. Pelc, *Method for correcting image distortion due to gradient*  
278 *nonuniformity*. 1986, Google Patents.
- 279 2. Michiels, J., et al., *On the problem of geometric distortion in magnetic resonance images*  
280 *for stereotactic neurosurgery*. *Magnetic resonance imaging*, 1994. **12**(5): p. 749-765.
- 281 3. Sumanaweera, T., et al., *Quantifying MRI geometric distortion in tissue*. *Magnetic*  
282 *resonance in medicine*, 1994. **31**(1): p. 40-47.
- 283 4. Langlois, S., et al., *MRI geometric distortion: a simple approach to correcting the effects*  
284 *of non-linear gradient fields*. *Journal of Magnetic Resonance Imaging: An Official Journal*  
285 *of the International Society for Magnetic Resonance in Medicine*, 1999. **9**(6): p. 821-831.
- 286 5. LeBihan, D. and R. Tumer, *Diffusion and perfusion, magnetic resonance imaging, Mozbey*  
287 *Year Book*. 1992, Inc.
- 288 6. Conturo, T.E., et al., *Diffusion MRI: precision, accuracy and flow effects*. *NMR in*  
289 *Biomedicine*, 1995. **8**(7): p. 307-332.
- 290 7. Bernstein, M.A. and J.A. Polzin, *Method and system for correcting errors in MR images*  
291 *due to regions of gradient non-uniformity for parametric imaging such as quantitative flow*  
292 *analysis*. 2000, Google Patents.
- 293 8. Bammer, R., et al., *Assessment of spatial gradient field distortion in diffusion-weighted*  
294 *imaging*. *Proceedings of the International Society for Magnetic Resonance in Medicine* ,  
295 Honolulu, HI, 2002: p. 1172.
- 296 9. Robson, M. *Non-linear gradients on clinical MRI systems introduce systematic errors in*  
297 *ADC and DTI measurements*. in *Proceedings of the 10th Annual Meeting of ISMRM,*  
298 *Honolulu*. 2002.
- 299 10. Basser, P.J., *Inferring microstructural features and the physiological state of tissues from*  
300 *diffusion-weighted images*. *NMR in Biomedicine*, 1995. **8**(7): p. 333-344.
- 301 11. Frank, L.R., *Anisotropy in high angular resolution diffusion-weighted MRI*. *Magnetic*  
302 *Resonance in Medicine: An Official Journal of the International Society for Magnetic*  
303 *Resonance in Medicine*, 2001. **45**(6): p. 935-939.
- 304 12. Bammer, R., et al., *Analysis and generalized correction of the effect of spatial gradient*  
305 *field distortions in diffusion-weighted imaging*. *Magnetic Resonance in Medicine: An*  
306 *Official Journal of the International Society for Magnetic Resonance in Medicine*, 2003.  
307 **50**(3): p. 560-569.
- 308 13. Setsompop, K., et al., *Pushing the limits of in vivo diffusion MRI for the Human*  
309 *Connectome Project*. *Neuroimage*, 2013. **80**: p. 220-233.
- 310 14. Malyarenko, D.I., et al., *Demonstration of nonlinearity bias in the measurement of the*  
311 *apparent diffusion coefficient in multicenter trials*. *J Magnetic resonance in medicine*,  
312 2016. **75**(3): p. 1312-1323.
- 313 15. Andersson, J.L. and S.N. Sotiropoulos, *An integrated approach to correction for off-*  
314 *resonance effects and subject movement in diffusion MR imaging*. *Neuroimage*, 2016. **125**:  
315 p. 1063-1078.
- 316 16. McNab, J.A., et al., *The Human Connectome Project and beyond: initial applications of*  
317 *300 mT/m gradients*. *Neuroimage*, 2013. **80**: p. 234-245.



- 318 17. Mesri, H.Y., et al., *The adverse effect of gradient nonlinearities on diffusion MRI: From*  
319 *voxels to group studies*. NeuroImage, 2019: p. 116127.
- 320 18. Tan, E.T., et al., *Improved correction for gradient nonlinearity effects in diffusion-weighted*  
321 *imaging*. Journal of Magnetic Resonance Imaging, 2013. **38**(2): p. 448-453.
- 322 19. Newitt, D.C., et al., *Gradient nonlinearity correction to improve apparent diffusion*  
323 *coefficient accuracy and standardization in the american college of radiology imaging*  
324 *network 6698 breast cancer trial*. Journal of Magnetic Resonance Imaging, 2015. **42**(4): p.  
325 908-919.
- 326 20. Malyarenko, D.I., B.D. Ross, and T.L. Chenevert, *Analysis and correction of gradient*  
327 *nonlinearity bias in apparent diffusion coefficient measurements*. Magnetic resonance in  
328 medicine, 2014. **71**(3): p. 1312-1323.
- 329 21. Malyarenko, D.I. and T.L. Chenevert, *Practical estimate of gradient nonlinearity for*  
330 *implementation of apparent diffusion coefficient bias correction*. Journal of Magnetic  
331 Resonance Imaging, 2014. **40**(6): p. 1487-1495.
- 332 22. Sotiropoulos, S.N., et al., *Advances in diffusion MRI acquisition and processing in the*  
333 *Human Connectome Project*. Neuroimage, 2013. **80**: p. 125-143.
- 334 23. Glasser, M.F., et al., *The minimal preprocessing pipelines for the Human Connectome*  
335 *Project*. Neuroimage, 2013. **80**: p. 105-124.
- 336 24. Janke, A., et al., *Use of spherical harmonic deconvolution methods to compensate for*  
337 *nonlinear gradient effects on MRI images*. Magnetic Resonance in Medicine: An Official  
338 Journal of the International Society for Magnetic Resonance in Medicine, 2004. **52**(1): p.  
339 115-122.
- 340 25. Doran, S.J., et al., *A complete distortion correction for MR images: I. Gradient warp*  
341 *correction*. Physics in Medicine & Biology, 2005. **50**(7): p. 1343.
- 342 26. Tao, S., et al., *Integrated image reconstruction and gradient nonlinearity correction*.  
343 Magnetic resonance in medicine, 2015. **74**(4): p. 1019-1031.
- 344 27. Tao, A.T., et al., *Improving apparent diffusion coefficient accuracy on a compact 3T MRI*  
345 *scanner using gradient nonlinearity correction*. Journal of Magnetic Resonance Imaging,  
346 2018. **48**(6): p. 1498-1507.
- 347 28. Tao, S., et al., *NonCartesian MR image reconstruction with integrated gradient*  
348 *nonlinearity correction*. Medical physics, 2015. **42**(12): p. 7190-7201.
- 349 29. Rogers, B.P., et al. *Phantom-based field maps for gradient nonlinearity correction in*  
350 *diffusion imaging*. in *Medical Imaging 2018: Physics of Medical Imaging*. 2018.  
351 International Society for Optics and Photonics.
- 352 30. Rogers, B.P., et al. *Stability of gradient field corrections for quantitative diffusion MRI*. in  
353 *Medical Imaging 2017: Physics of Medical Imaging*. 2017. International Society for Optics  
354 and Photonics.
- 355 31. Tough, R.J. and A.J. Stone, *Properties of the regular and irregular solid harmonics*.  
356 Journal Of Physics A: Mathematical General, 1977. **10**(8): p. 1261.
- 357 32. Caola, M., *Solid harmonics and their addition theorems*. Journal of Physics A:  
358 Mathematical General, 1978. **11**(2): p. L23.
- 359 33. Makris, N., et al., *MRI-based anatomical model of the human head for specific absorption*  
360 *rate mapping*. Medical & biological engineering & computing, 2008. **46**(12): p. 1239-  
361 1251.

- 362 34. Mattiello, J., P.J. Basser, and D. Le Bihan, *The b matrix in diffusion tensor echo-planar*  
363 *imaging*. *Magnetic Resonance in Medicine*, 1997. **37**(2): p. 292-300.
- 364 35. Mattiello, J., P.J. Basser, and D. LeBihan, *Analytical expressions for the b matrix in NMR*  
365 *diffusion imaging and spectroscopy*. *Journal of magnetic resonance, Series A*, 1994.  
366 **108**(2): p. 131-141.
- 367 36. Alger, J.R., *The diffusion tensor imaging toolbox*. *Journal of Neuroscience*, 2012. **32**(22):  
368 p. 7418-7428.
- 369 37. Andersson, J.L., S. Skare, and J. Ashburner, *How to correct susceptibility distortions in*  
370 *spin-echo echo-planar images: application to diffusion tensor imaging*. *Neuroimage*, 2003.  
371 **20**(2): p. 870-888.
- 372 38. Pierpaoli, C., et al. *Polyvinylpyrrolidone (PVP) water solutions as isotropic phantoms for*  
373 *diffusion MRI studies*. in *Proc Intl Soc Magn Reson Med*. 2009.
- 374 39. Jenkinson, M., et al., *Improved optimization for the robust and accurate linear registration*  
375 *and motion correction of brain images*. *Neuroimage*, 2002. **17**(2): p. 825-841.
- 376 40. Lee, Y., et al., *A comprehensive approach for correcting voxel-wise b-value errors in*  
377 *diffusion MRI*. 2019.

378

379

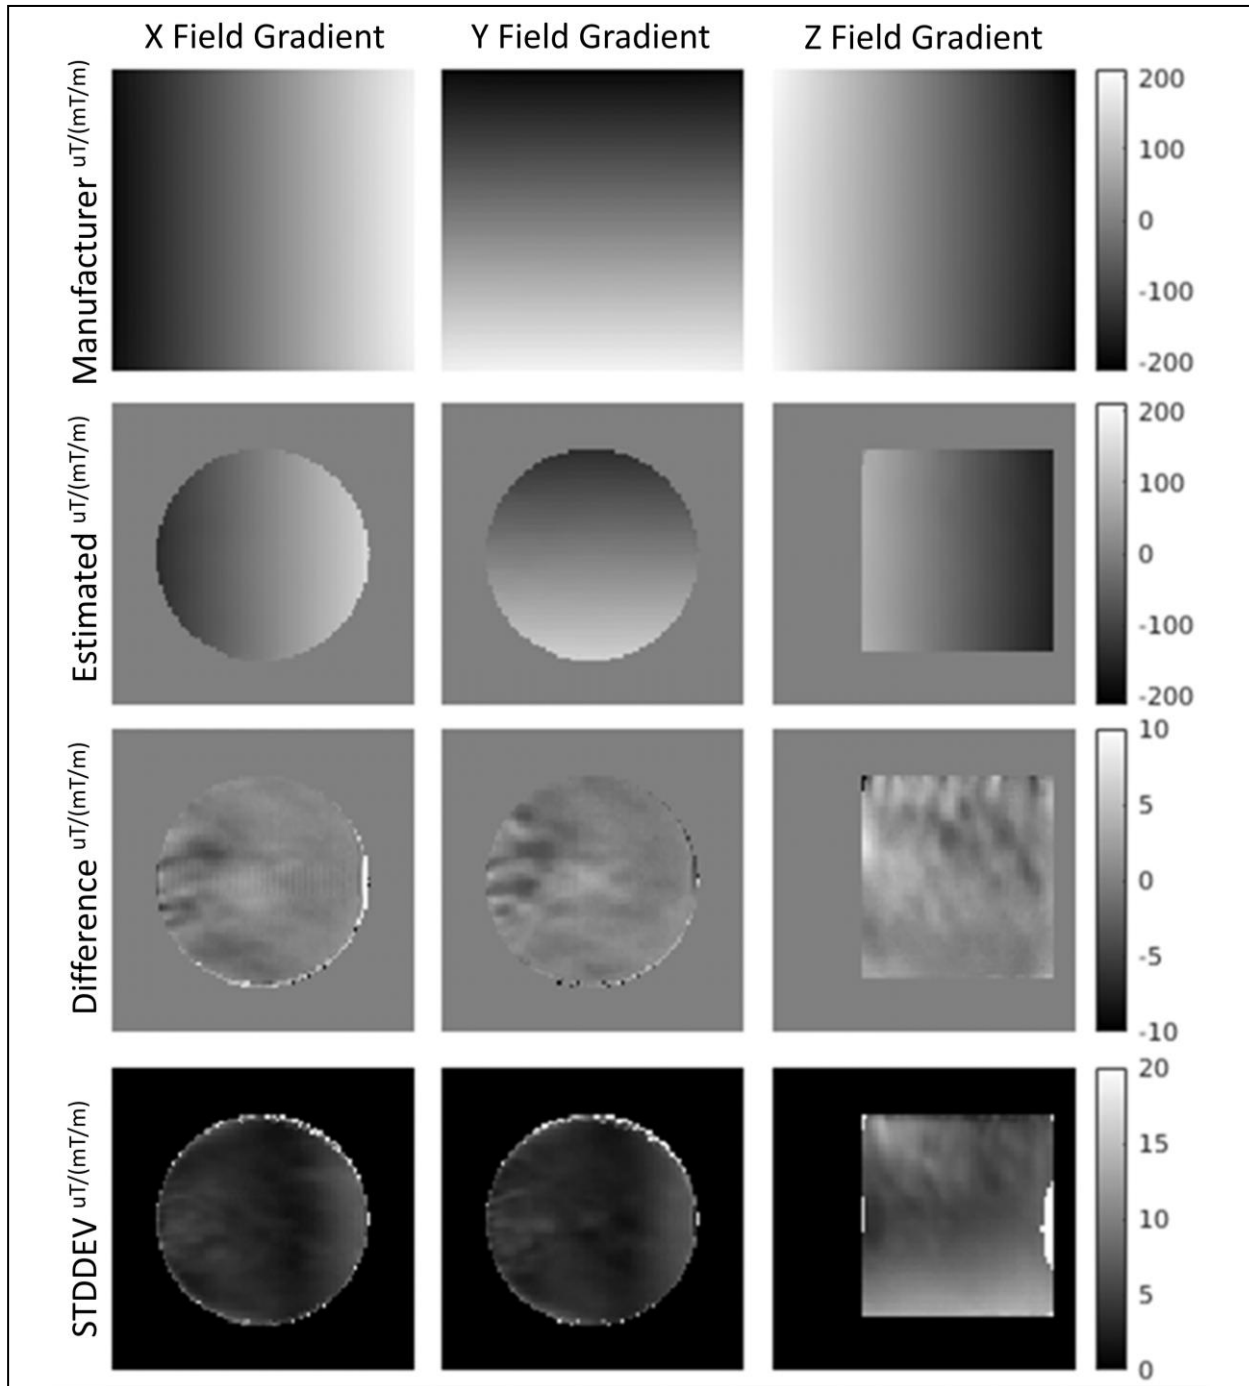

Figure 1. Here we show the manufacturer specified fields (top), the averaged empirically estimated (directly measured) fields (middle-top), the difference between these (middle-bottom), and the standard deviation in the empirically estimated fields across time (bottom) in units of  $uT$  (per  $mT/m$  of applied gradient). The field of view is  $384mm$  by  $384mm$ , and a mask is applied to the fields according the usable regions within the oil phantom ( $135mm$  radius from isocenter). The  $x$  and  $y$  magnetic field gradients are shown as an axial slices at isocenter ( $192mm$ ), and the  $z$  magnetic field gradient is shown as a sagittal slice at isocenter ( $192mm$ ).

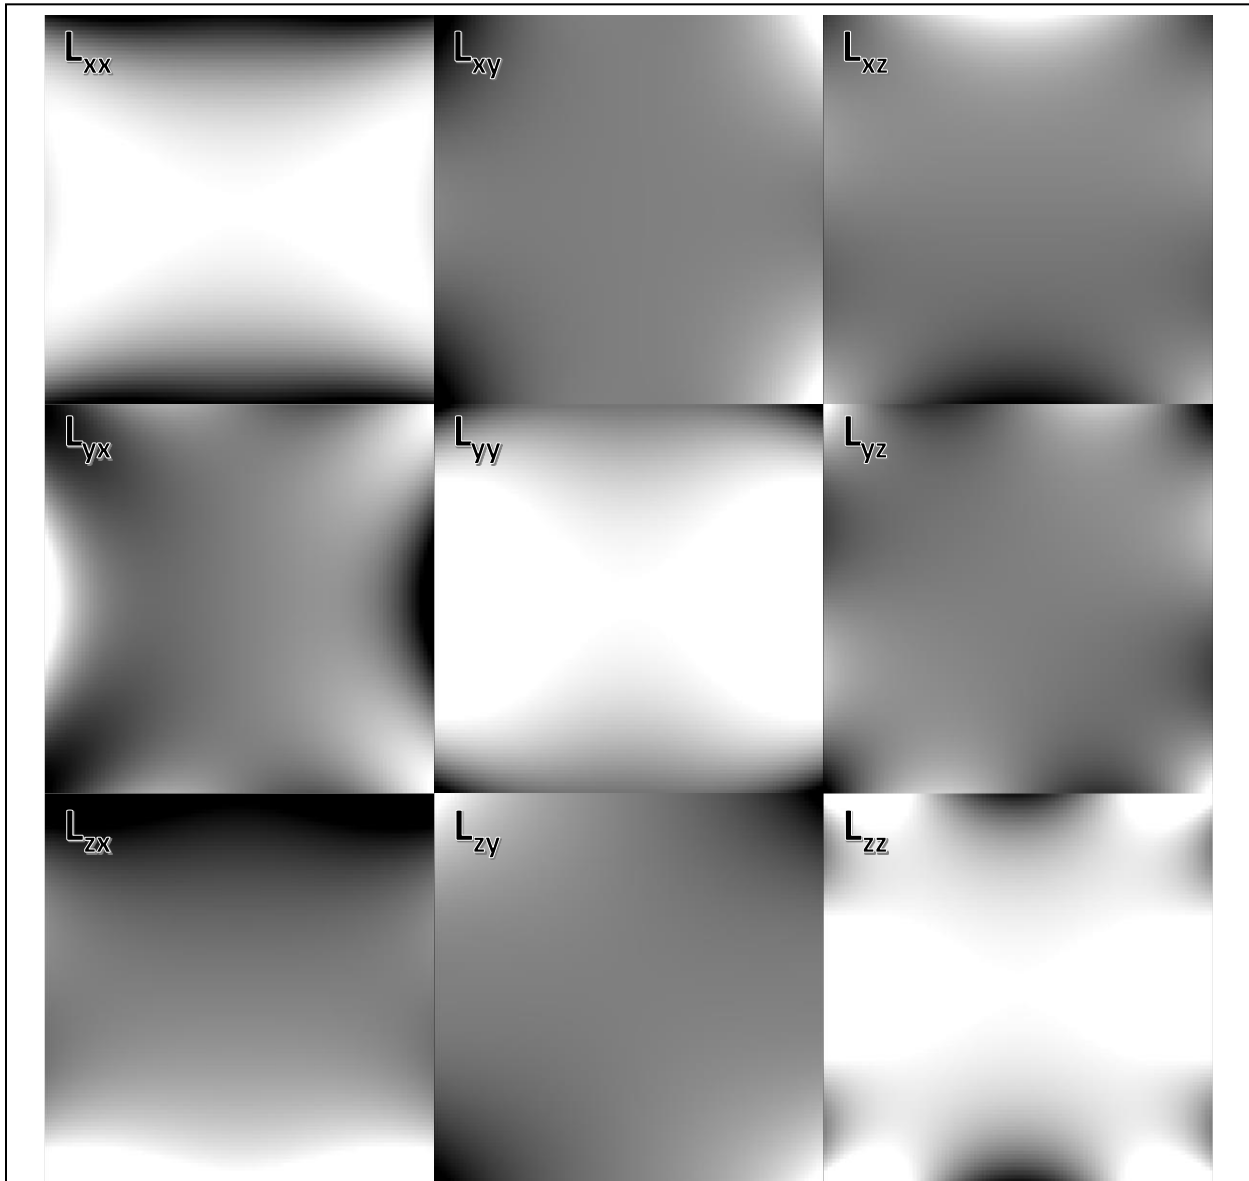

Figure 2. Gradient coil tensor  $L(r)$  (sagittal view) for each voxel position using 7<sup>th</sup> order spherical harmonic expansion using only odd order terms. This was generated using the coefficients estimated from the empirical field mapping procedure.

382

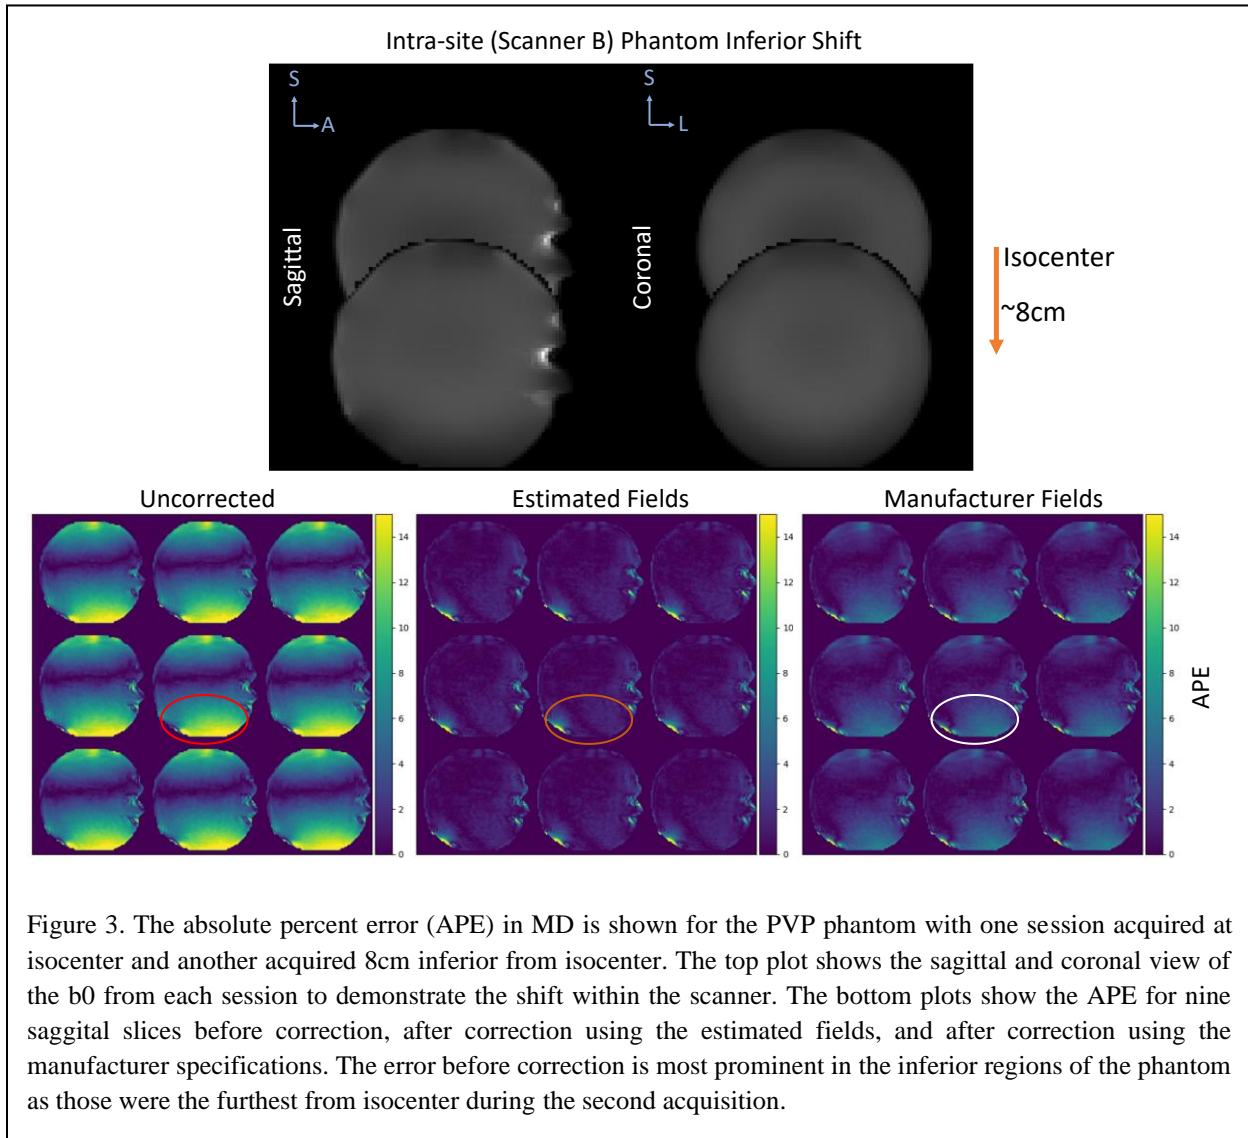

383

384

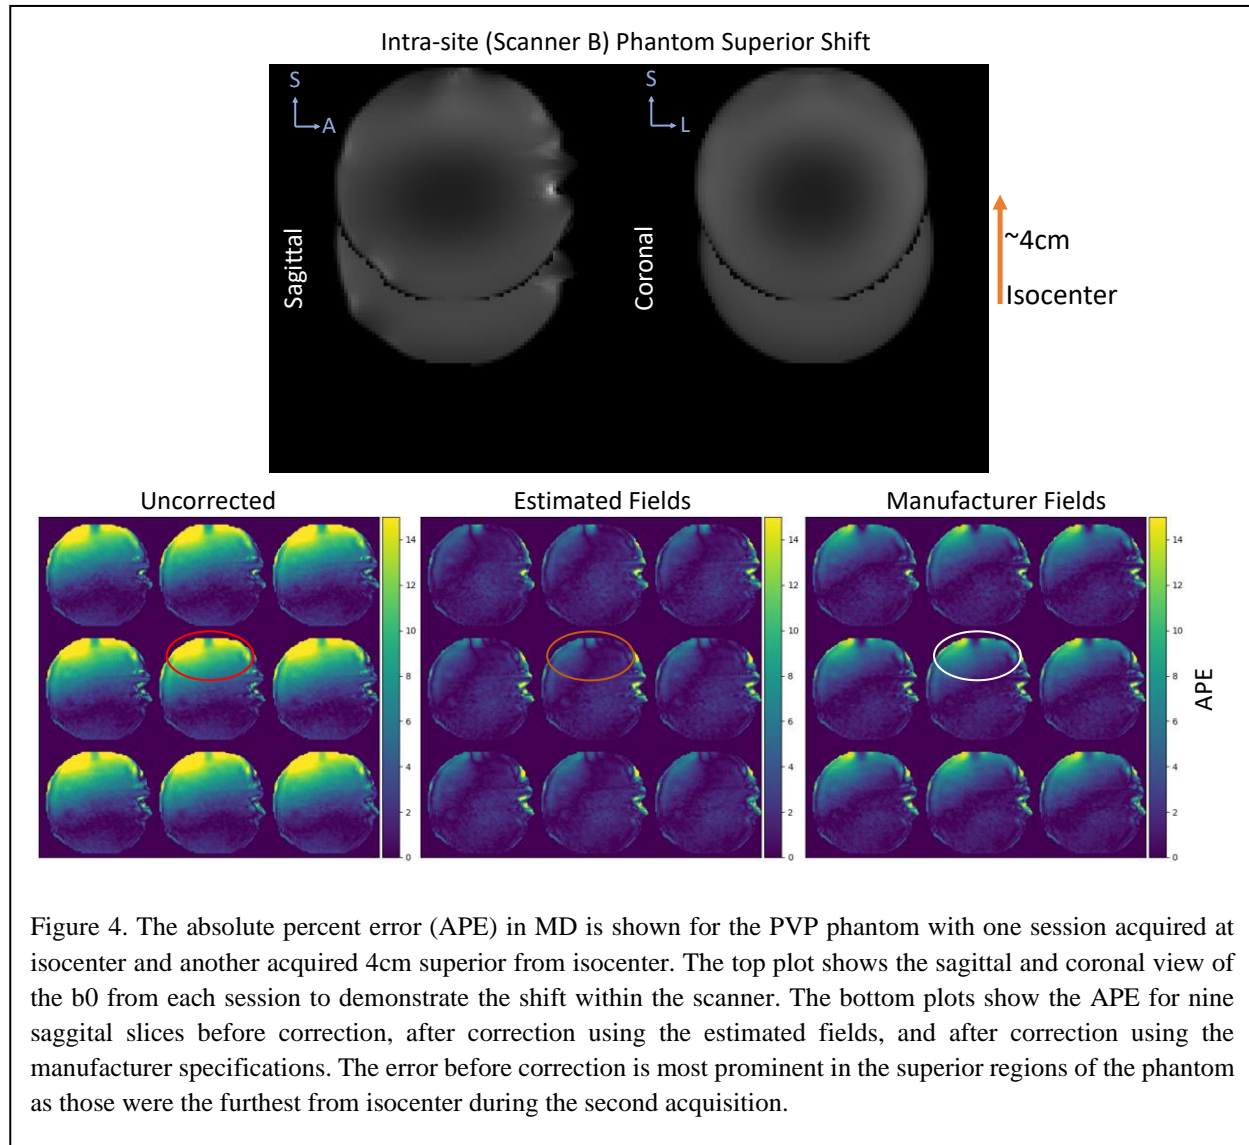

Figure 4. The absolute percent error (APE) in MD is shown for the PVP phantom with one session acquired at isocenter and another acquired 4cm superior from isocenter. The top plot shows the sagittal and coronal view of the b0 from each session to demonstrate the shift within the scanner. The bottom plots show the APE for nine sagittal slices before correction, after correction using the estimated fields, and after correction using the manufacturer specifications. The error before correction is most prominent in the superior regions of the phantom as those were the furthest from isocenter during the second acquisition.

385

386

387

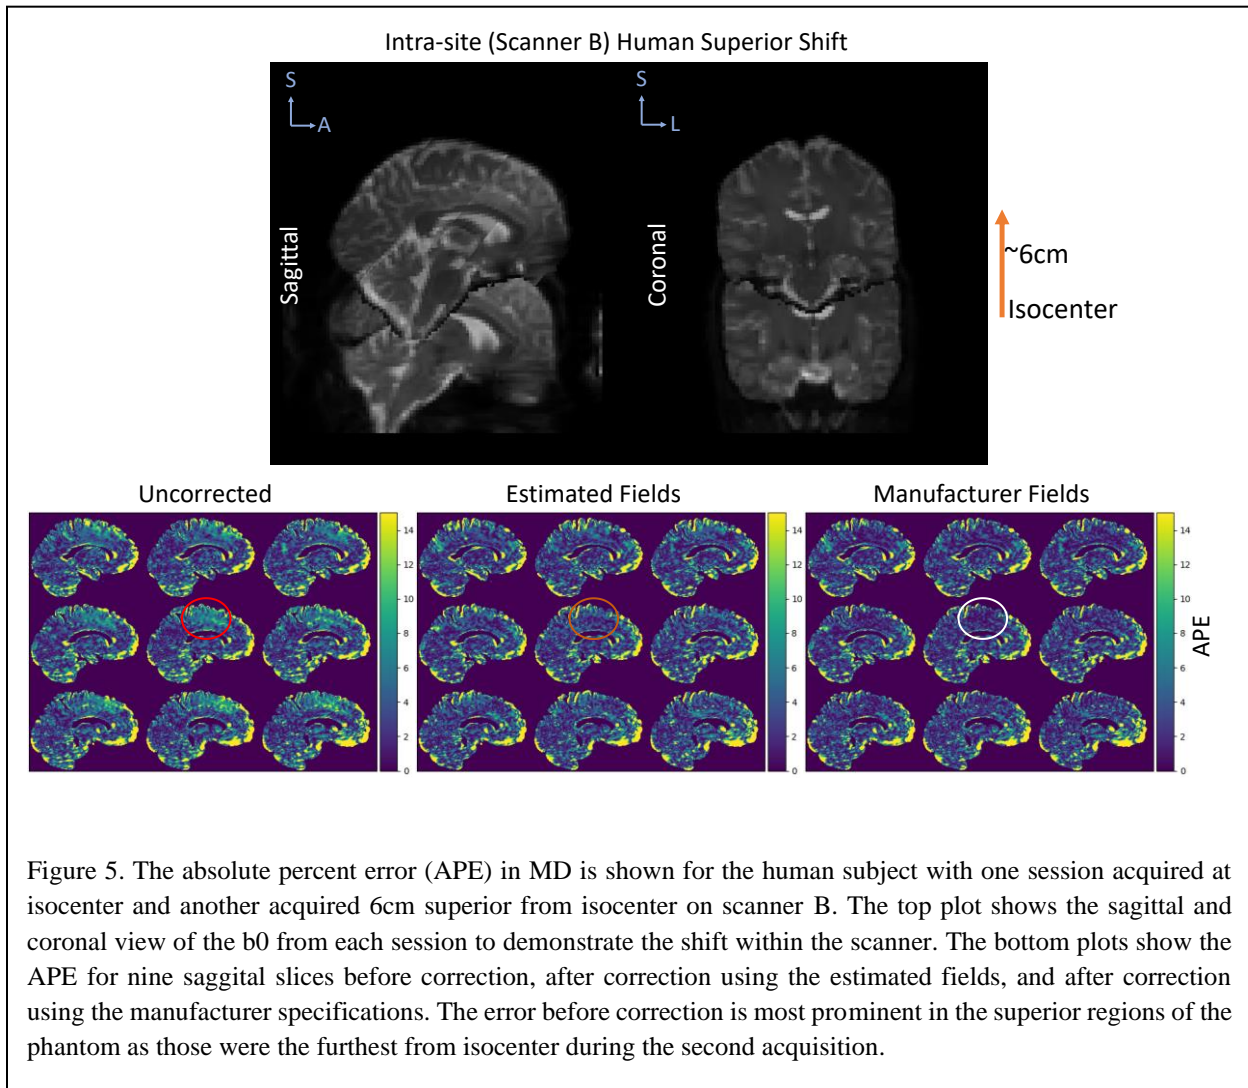

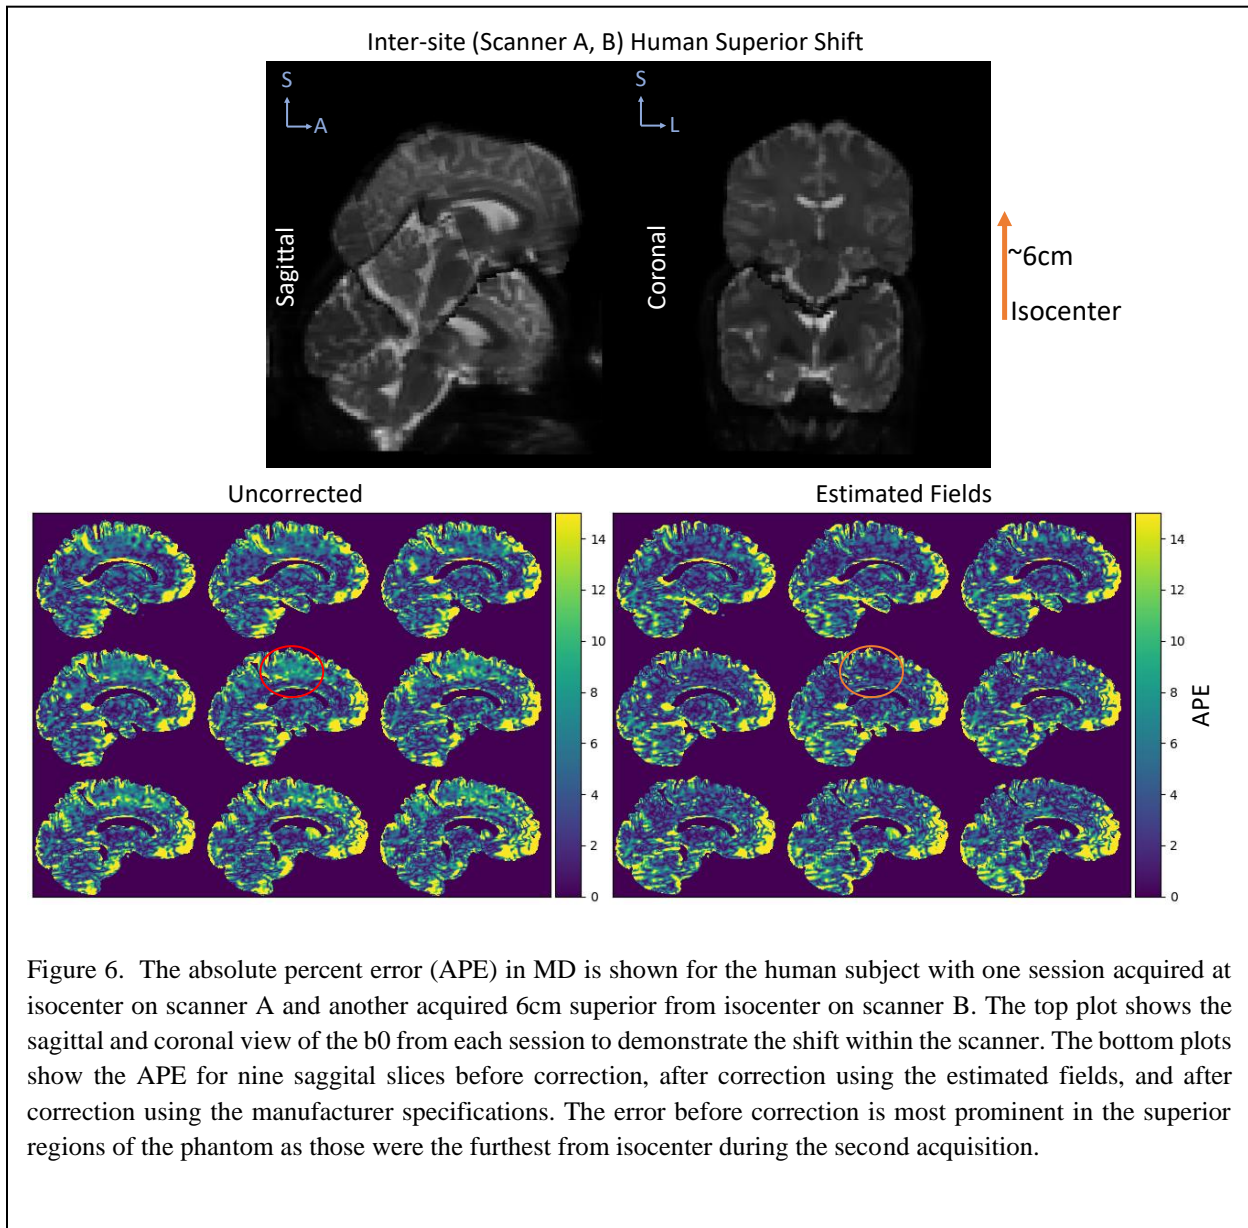

Figure 6. The absolute percent error (APE) in MD is shown for the human subject with one session acquired at isocenter on scanner A and another acquired 6cm superior from isocenter on scanner B. The top plot shows the sagittal and coronal view of the b0 from each session to demonstrate the shift within the scanner. The bottom plots show the APE for nine sagittal slices before correction, after correction using the estimated fields, and after correction using the manufacturer specifications. The error before correction is most prominent in the superior regions of the phantom as those were the furthest from isocenter during the second acquisition.



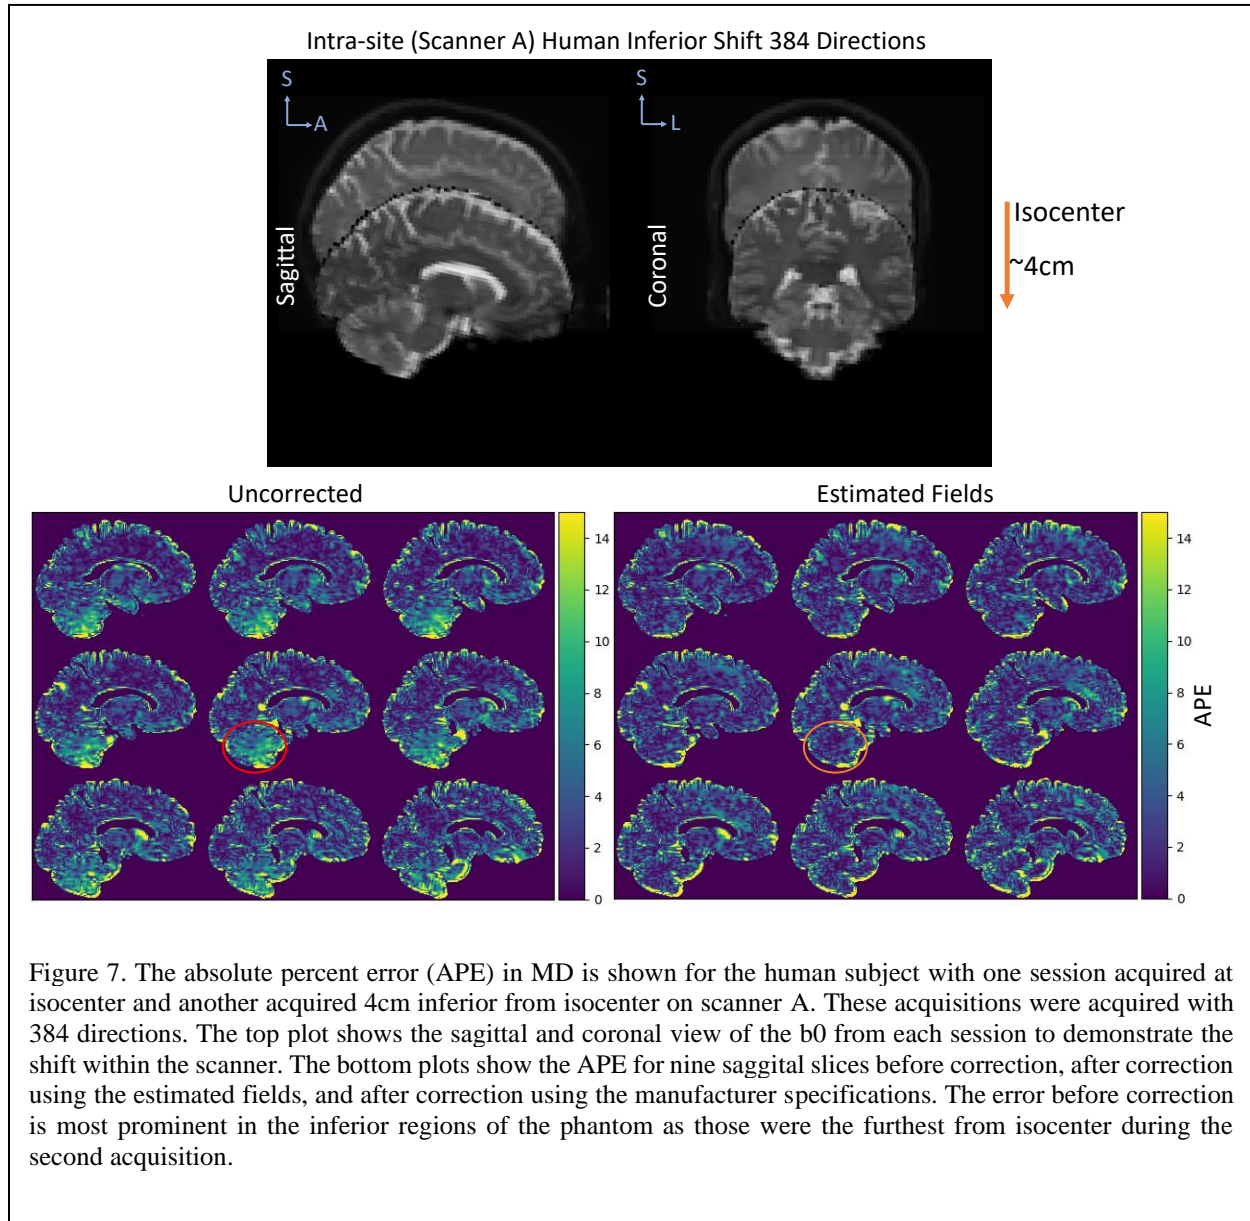

390

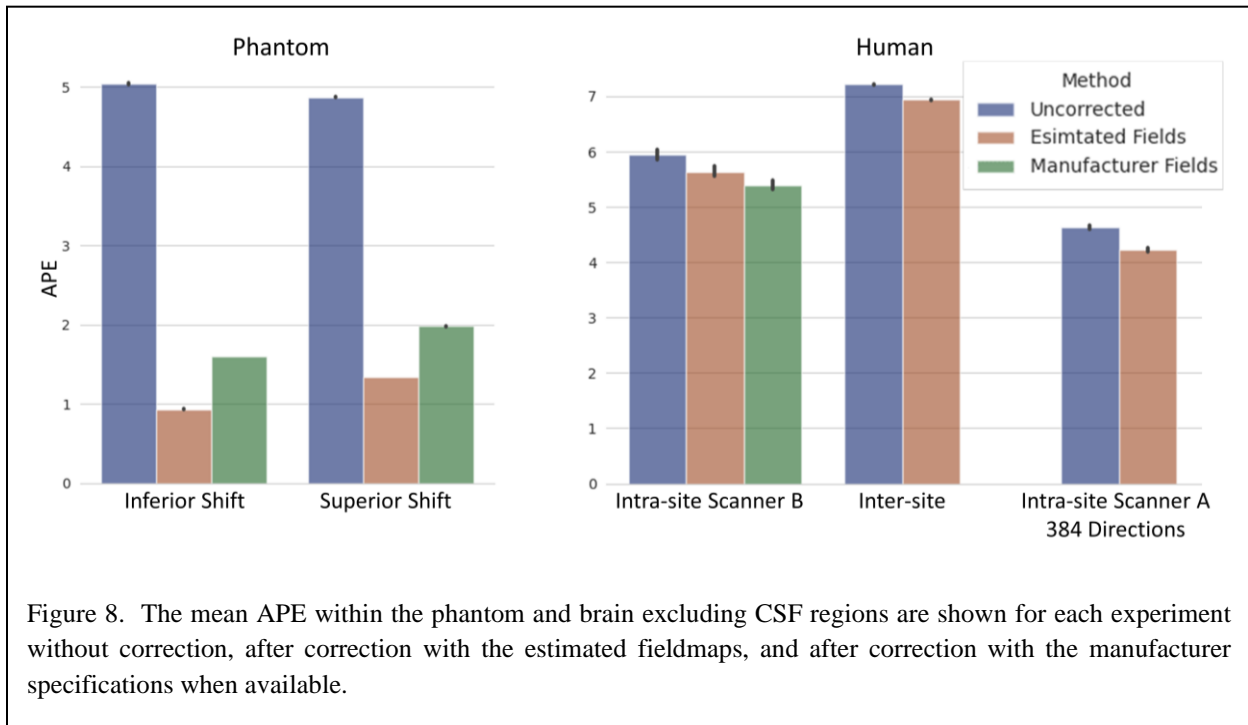

Figure 8. The mean APE within the phantom and brain excluding CSF regions are shown for each experiment without correction, after correction with the estimated fieldmaps, and after correction with the manufacturer specifications when available.

391 **APPENDIX A**  
392 The PVP phantom is corrected using fieldmaps estimated with various orders of solid harmonics.  
393 Regardless of the order, both FA and MD reproducibility errors decrease when compared to the  
394 uncorrected error. However, we find that a 3<sup>rd</sup> order basis results in the lowest FA error but a higher  
395 MD error. Between the higher order basis, the 7<sup>th</sup> order solid harmonics achieves lower FA error.

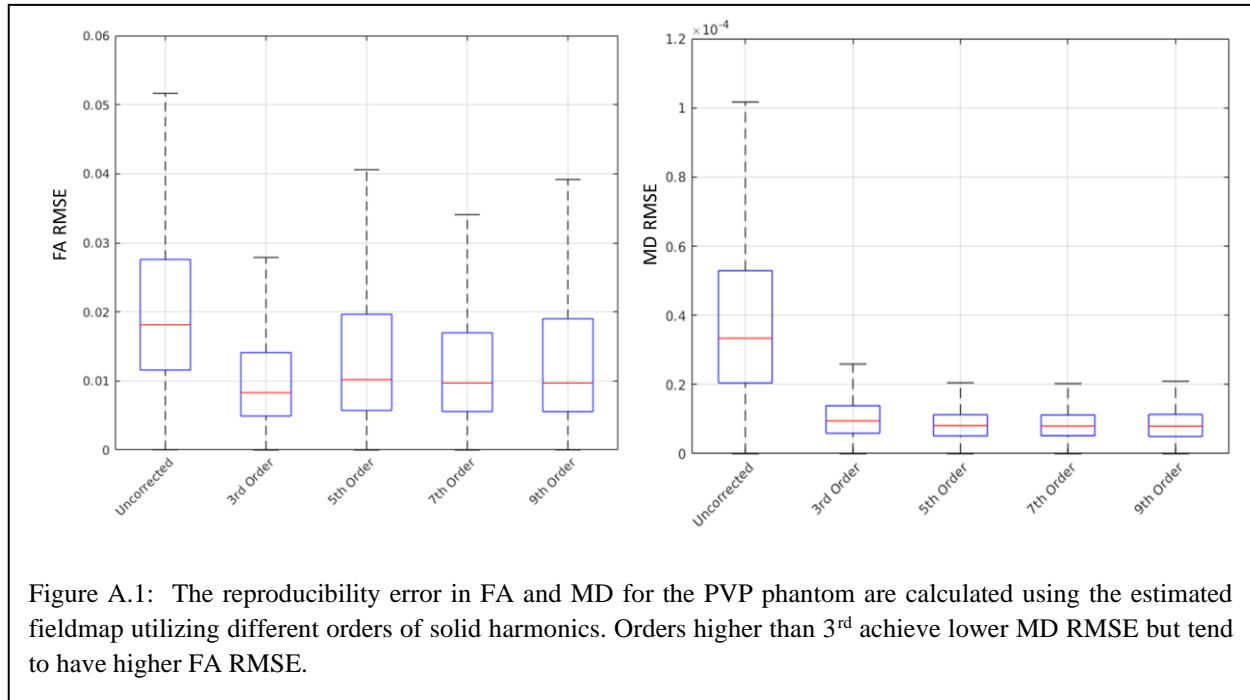

Source: https://www.biorxiv.org/content/biorxiv/early/2020/11/16/2020.05.18.102558.full.pdf
